1 **Title: An endogenous amdoparvovirus in the genome of the Transcaucasian mole vole**  
2 **(*Ellobius lutescens*): implications for ecology and evolution of carnivore**  
3 **amdoparvoviruses.**

4  
5 **Authors:** Soledad Marsile-Medun<sup>1,2</sup> and Robert James Gifford<sup>1</sup>

6  
7 **Affiliations:**

8 1. MRC-University of Glasgow Centre for Virus Research, 464 Bearsden Road, Glasgow, UK

9 2. Agrocampus Ouest, 65 Rue de Saint-Brieuc, 35000 Rennes, France

10

11 **Corresponding author:** Robert J. Gifford, MRC-University of Glasgow Centre for Virus

12 Research, Glasgow, UK. E-mail: robert.gifford@glasgow.ac.uk

13

14 **Abstract**

15 Sequences derived from parvoviruses (family *Parvoviridae*) occur relatively frequently in  
16 eukaryotic genomes, and can be used to investigate the co-evolutionary history of parvoviruses  
17 and their hosts. Here, we report the identification of sequences derived from amdoparvoviruses  
18 in the genome of a rodent - the Transcaucasian mole vole (*Ellobius lutescens*). We recovered  
19 the putative ancestral coding sequences of these endogenous viral elements, and showed that  
20 they group robustly with exogenous amdoviruses in phylogenetic trees. We identified the  
21 corresponding empty genomic integration sites in the genome of a sister species - the northern  
22 mole vole (*Ellobius talpinus*) - indicating that both elements were integrated into the *Ellobius*  
23 *lutescens* germline within the last 10 million years. Our findings extend the host range of  
24 amdoparvoviruses to a second mammalian order (Rodentia), and indicate that the various  
25 carnivore amdoviruses that have so far been identified are likely to derive from independent  
26 cross-species transmission events.

27

28 **Background**

29 Amdoparvovirus is a newly defined parvoviral genus in the family *Parvoviridae* [1]. The  
30 type species - Aleutian mink disease virus (AMDV) - causes an immune complex-associated  
31 progressive syndrome in mink (Family *Mustelidae*: genera *Neovison* and *Mustela*) called  
32 Aleutian disease or plasmacytosis. First described in 1956, Aleutian disease is presently  
33 considered the most important infectious disease affecting farm-raised mink [2, 3]. Relatively  
34 little is known about the evolutionary history and natural biology of amdoparvoviruses. However,

1 AMDV infection is known to be widespread in wild mink as well as in farmed animals [2]. In  
2 recent years, amdoparvovirus infections have also been identified in raccoon dogs [4]. In  
3 addition, amdoparvovirus sequences have been recovered from tissues sampled from other  
4 carnivore species, including foxes and skunks [5-8].

5 Endogenous viral elements (EVEs) are sequences derived from virus genomes that  
6 have been integrated into the nuclear genome of germline cells. These sequences enable  
7 calibration of virus evolution across macroevolutionary timescales, and can provide insights into  
8 the long-term evolutionary associations between viruses and hosts [9, 10]. Progress in genome  
9 sequencing has revealed that EVEs derived from parvoviruses occur relatively frequently in  
10 eukaryotic genomes [11-14]. So far, however, no EVEs have been described that group closely  
11 with parvoviruses in phylogenetic trees. Here we describe the first clear example of an EVE  
12 derived from an amdoparvovirus, in the genome of the Transcaucasian mole vole (*Ellobius*  
13 *lutescens*).

14

## 15 Results

16 We screened 362 vertebrate genome assemblies (**Table S1**) for sequences closely  
17 related to Amdoparvoviruses. Searches using the replicase (NS) and capsid (VP) proteins of  
18 AMDV identified six distinct sequences that exhibited greater similarity to amdoparvoviruses  
19 than to other parvovirus groups (**Table 1**). One of these - in the Cape hyrax (*Procavia capensis*)  
20 - has been described previously [13] and spans a relatively short genomic region: ~100 amino  
21 acid (aa) residues in length. Similar length matches were identified in the Tasmanian devil  
22 (*Sarcophilus harrisi*), armadillo (*Orycteropus afer*), and pit viper (*Protobothrops*  
23 *mucrosquamatus*) genomes. The short length of these sequences - all of which grouped outside  
24 the Amdoparvovirus clade in phylogenies (**Figure S1**) - meant that it was not possible to  
25 determine whether they derive from viruses that would be considered *bona fide* members of the  
26 Amdoparvovirus genus, or from viruses belonging to a more distantly related, potentially extinct  
27 parvovirus lineage.

28 However, we identified two longer sequences in the genome of the Transcaucasian mole  
29 vole (*Ellobius lutescens*) that exhibited a much higher degree of similarity to AMDV. The first  
30 comprised a near complete genome (with both the viral replicase (NS) and capsid protein (VP)  
31 genes present), and the second spanned the majority of the NS gene (**Figure 1a**). We  
32 constructed maximum likelihood (ML) phylogenies using conserved regions of the putative NS  
33 and VP peptide sequences encoded by these elements. Phylogenies showed that both  
34 elements were relatively closely related, and grouped robustly within the clade defined by

1 exogenous amdoparvoviruses (**Figure 1b, Figure S1**). They were therefore labelled *Ellobius*  
2 *lutescens* endogenous amdoparvovirus (AmdoPVe-EIIIut) 1 and 2.

3 In between the two major open reading frames (ORFs), NS and VP, amdoparvovirus  
4 genomes have a short middle ORF (M-ORF) of unknown function. As shown in the **Figure 1a**,  
5 AmpVVe-EIIIut.1 encodes both the NS and VP genes. A region of potentially protein-coding  
6 sequence that corresponds to the M-ORF of AMDV is also present. A methionine residue that  
7 might represent the start codon of an M-ORF gene product could not be identified (notably, this  
8 is also the case for several exogenous amdovirus isolates). Both the NS and VP ORFs of  
9 AmpVVe-EIIIut.1 have gaps relative to AMDV. The gap in NS is apparently due to a deletion  
10 (since the corresponding region is present in AmpVVe-EIIIut.2). The VP pseudogene encoded by  
11 AmpVVe-EIIIut.1 has a gap relative to the AMDV VP that spans most of the 5' region of the  
12 gene, presumably due to these sequences having been deleted. Frameshifting mutations are  
13 present in both the NS and VP pseudogenes of AmpVVe-EIIIut.1. The element is integrated into  
14 a locus that is homologous to mouse chromosome 12.

15 The AmpVVe-EIIIut.2 element comprises the NS gene alone (**Figure 1a**). This element is  
16 integrated into a locus immediately adjacent to the sequences encoding the MAF BZIP  
17 transcription factor G (MAFG) gene, which in the mouse genome is located in the 11qE2 region  
18 of chromosome 11. The NS gene encoded by AmpVVe-EIIIut.2 lacks a methionine start codon,  
19 but intriguingly, encodes a complete NS sequence that is otherwise intact.

20 The Transcaucasian mole vole (*E. lutescens*) is a species of cricetid rodent inhabiting  
21 semi-arid or grassland areas in Central Asia, and is notable for its unusual karyotype - all  
22 individuals possessing a diploid number of 17 chromosomes. Only a single sex chromosome  
23 [15] is present - with the Y chromosome having been eliminated. This interesting characteristic  
24 has motivated the sequencing of the *E.lutescens* genome, as well as that of a sister species -  
25 the northern mole vole (*E. talpinus*) [16]. We identified empty integration sites in the *E. talpinus*  
26 genome at the loci where the AmdoPVe-EIIIut-1 and AmdoPVe-EIIIut-2 elements are  
27 integrated in *E.lutescens*. This indicates that both elements were integrated into the *E.lutescens*  
28 germline after these two species diverged ~10 million years ago (MYA) [17, 18]. It seems  
29 unlikely, however, that either element has been integrated in very recent times. Firstly, the  
30 degraded nature of AmpVVe-EIIIut.1 indicates that it has been resident in the germline for some  
31 time. Furthermore, two *E.lutescens* individuals have been sequenced (a male and a female). We  
32 identified both insertions in both individuals, suggesting they are likely to be fixed, or to occur at  
33 high frequency in the species gene pool.

1           The identification of empty integration in *E. talpinus* facilitated the identification of EVE-  
2 genome junctions for both the AmdoPVe elements. In the case of AmdoPVe-EIILut-2, genomic  
3 flanks occur closely flank the NS gene, suggesting that it was likely derived from an mRNA that  
4 was reverse transcribed and integrated into the nuclear genome of an ancestral germline cell.  
5 By contrast, AmdoPVe-EIILut-1 appears to be derived from genome-length nucleic acid. In  
6 addition to containing regions of both NS and VP, this element includes a region of 3' sequence  
7 between the end of VP and the beginning of the genomic flanking sequence that exhibits  
8 similarity to the 3' untranslated region of AMDV, and contains inverted repeats capable of  
9 folding into a stem loop structure (data not shown). We could not, however, identify sequences  
10 corresponding to the 5' UTR in the AmdoPVe-EIILut-1 element. No methionine start codon could  
11 be identified in at the start of the NS pseudogene encoded by this element, but based on  
12 comparisons to AMDV, it appeared to be close to, or contiguous with the 5' genomic flanking  
13 sequence.

14

## 15 **Discussion**

16           So far, all Amdoparvoviruses have only been identified infecting carnivores (order  
17 Carnivora). In this study, we identified two EVEs derived from amdoparvoviruses in the genome  
18 of the Transcaucasian mole vole, extending the amdoparvovirus host range to a second  
19 mammalian order (Rodentia). Recently, a partial amdoparvovirus capsid sequence was  
20 identified via metagenomic screening of samples derived from the least horseshoe bat  
21 (*Rhinolophus pusillus*), suggesting that bats (order Chiroptera) may also harbour  
22 amdoparvoviruses. However, as with all virus sequences recovered via metagenomic  
23 sequencing, there remains a degree of uncertainty regarding host associations [19], whereas  
24 the presence of an EVE in the germline of a given species unambiguously demonstrates an  
25 association between that species and the virus group from which the EVE was derived.

26           Unlike the short amdoparvovirus-related EVEs described previously [13], the elements  
27 identified here spanned near-complete amdoparvovirus genes or genomes. Moreover, in ML  
28 phylogenies, both elements grouped robustly within the amdoparvovirus clade as defined by  
29 exogenous isolates. Our data indicate that both elements – which share ~80% identity at the  
30 amino acid level - were integrated into the *E. lutescens* germline within the last 10 million years  
31 (**Figure S2**). One element (AmdoPVe-EIILut-1) was relatively degraded, indicative of a long  
32 period of residence within the host germline. However, the AmdoPVe-EIILut-2 element  
33 comprises a single NS gene that is not interrupted by stop codons and frameshifts. Amongst the  
34 various parvovirus-derived EVEs that have been reported so far, several have exhibited such

1 intact or nearly intact replicase genes. Furthermore, in a previous study, we showed tissue-  
2 specific transcription of an intact, replicase-encoding EVE in the genome of the degu (*Octodon*  
3 *degus*) [20]. The identification of yet another, relatively intact and independently acquired  
4 parvovirus replicase in a rodent genome deepens the mystery surrounding these elements.  
5 Given that fixation of EVEs is extremely unlikely, the independent acquisition of intact parvovirus  
6 replicase genes by several mammalian species suggests that these elements are being  
7 functionalised and selected for in some as yet undetermined way.

8         The phylogenetic relationships of the endogenous elements described here relative to  
9 exogenous carnivore amdoparvoviruses are quite revealing. Remarkably, we found that  
10 elements from the *E. lutescens* genome robustly separate carnivore isolates from skunks from  
11 those found in raccoon dogs, mink and foxes. Prior to the identification of amdovirus EVEs, all  
12 isolates in the *Amdoparvovirus* genus might have been considered to represent a complex of  
13 closely related virus species circulating in carnivores. The observation that an ancient EVE is  
14 more closely related to AMDV than AMDV is to amdoparvoviruses infecting raccoon dogs  
15 suggests that multiple, introductions of amdoparvoviruses into carnivore species have likely  
16 occurred, potentially from rodent hosts.

17

## 18 **Methods**

### 19 *Genome screening and sequence analysis*

20         Vertebrate genome assemblies were obtained from NCBI genomes (**Table S1**).  
21 Screening was performed using the database-integrated genome-screening tool (available from  
22 <http://giffordlabcvr.github.io/DIGS-tool/>). ORFs were inferred by manual comparison of putative  
23 peptide sequences to those of closely related exogenous parvoviruses. The putative peptide  
24 sequences of Amdoparvovirus-related EVEs were aligned with NS and VP sequences of  
25 representative Amdoparvoviruses and Protoparvoviruses using MUSCLE [21] and PAL2NAL  
26 [22]. Phylogenies were reconstructed from this alignment, using maximum likelihood as  
27 implemented in RaxML [23], and the RtEV protein substitution model [24] as selected using  
28 ProTest [25].

1 **Table 1. Amdoparvovirus hits from *in silico* genome screening.**

2

| Element          | Organism               | Genes   | Scaffold*      | Start  | End    | O*  | Length** |
|------------------|------------------------|---------|----------------|--------|--------|-----|----------|
| AmdoPVe-EiILut.1 | <i>Mole vole</i>       | NS-M-VP | LOEQ01006026.1 | 6398   | 10207  | +ve | 839      |
| AmdoPVe-EiILut.2 | <i>Mole vole</i>       | NS      | LOEQ01001077.1 | 110870 | 112639 | +ve | 589      |
| PVe-ProCap.1     | <i>Cape hyrax</i>      | M-VP    | ABRQ02031156.1 | 7932   | 8225   | +ve | 98       |
| PVe-ProMuc.1     | <i>Pit viper</i>       | VP      | BCNE02035092.1 | 59618  | 60139  | -ve | 184      |
| PVe-SarHar.1     | <i>Tasmanian devil</i> | VP      | AFEY01431940.1 | 6434   | 6646   | -ve | 71       |
| PVe-OryAfe.1     | <i>Aardvark</i>        | VP      | ALYB01102612.1 | 8482   | 8882   | -ve | 100      |

3

4 **Footnote:** \* Genbank accession numbers are shown for genomic scaffolds \*O=orientation in scaffold. \*\* length is  
5 shown in codons. Abbreviations: NS=replicase; M=middle ORF; VP=capsid protein.

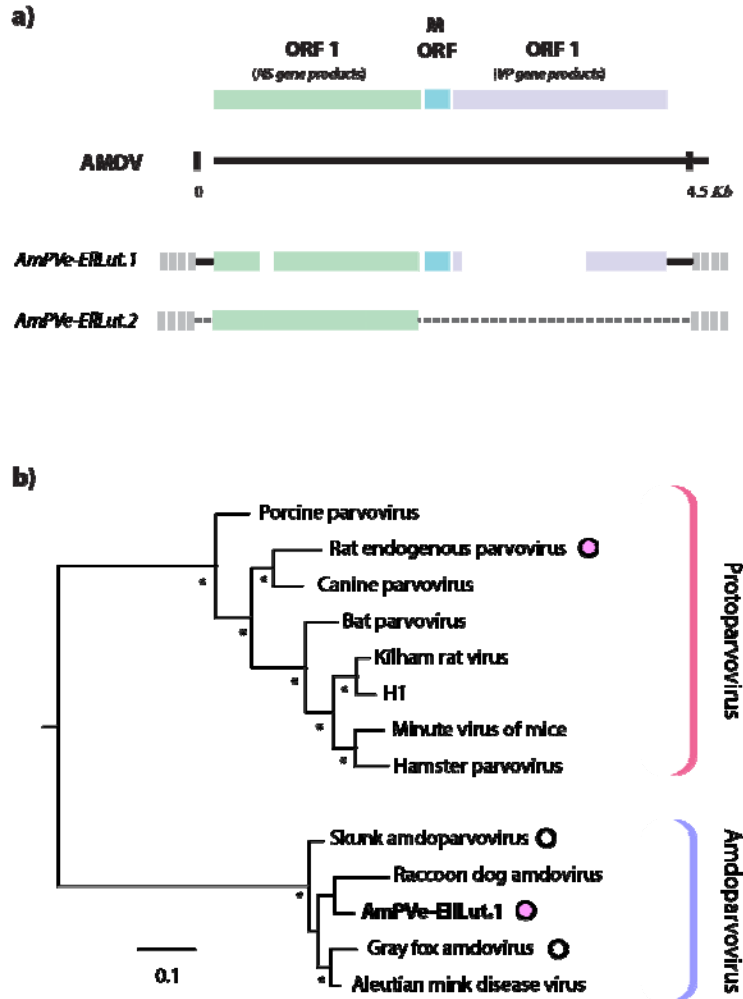

1  
2  
3 **Figure 1. (a) Genome structure of AmPVe-EIILut elements.** Asterisks (\*) indicate stop  
4 codons. Green and orange arrowheads on non-structural (NS) protein indicate the position of  
5 conserved amino acid motifs of parvoviruses. AmdoPVe-EIILut = *Ellobius lutescens*  
6 endogenous amdoparvovirus. **(b) Phylogenetic relationships of amdoparvovirus and**  
7 **protoparvovirus sequences.** Maximum likelihood phylogeny showing the estimated  
8 evolutionary relationships between amdoparvoviruses and protoparvoviruses. Brackets to the  
9 right indicate the relevant genera. The scale bar shows evolutionary distance in substitutions  
10 per amino acid site. Pink-filled circles indicate endogenous taxa. White-filled circles indicate  
11 taxa identified via sequencing. Asterisks indicate nodes with maximum likelihood bootstrap  
12 support >80%. Genbank accession numbers are listed in **Table S2**.

## 1 Acknowledgements

2 RJG was funded by the Medical Research Council of the United Kingdom (MC\_UU\_12014/12).  
3 We thank Andrew Davison and Joseph Hughes for their comments and feedback on the  
4 manuscript.

5

## 6 References

- 7 1. Cotmore, S.F., et al., *The family Parvoviridae*. Arch Virol, 2014. **159**(5): p. 1239-47.
- 8 2. Canuti, M., H.G. Whitney, and A.S. Lang, *Amdoparvoviruses in small mammals: expanding our understanding of parvovirus diversity, distribution, and pathology*. Front Microbiol, 2015. **6**: p. 1119.
- 9 3. Canuti, M., et al., *Driving forces behind the evolution of the Aleutian mink disease parvovirus in the context of intensive farming*. Virus Evol, 2016. **2**(1): p. vew004.
- 10 4. Li, L., et al., *Novel amdovirus in gray foxes*. Emerg Infect Dis, 2011. **17**(10): p. 1876-8.
- 11 5. Pennick, K.E., et al., *Aleutian disease in two domestic striped skunks (Mephitis mephitis)*. Vet Pathol, 2007. **44**(5): p. 687-90.
- 12 6. Shao, X.Q., et al., *Novel amdoparvovirus infecting farmed raccoon dogs and arctic foxes*. Emerg Infect Dis, 2014. **20**(12): p. 2085-8.
- 13 7. LaDouceur, E.E., et al., *Aleutian Disease: An Emerging Disease in Free-Ranging Striped Skunks (Mephitis mephitis) From California*. Vet Pathol, 2015. **52**(6): p. 1250-3.
- 14 8. Canuti, M., et al., *Full genetic characterization and epidemiology of a novel amdoparvovirus in striped skunk (Mephitis mephitis)*. Emerg Microbes Infect, 2017. **6**(5): p. e30.
- 15 9. Feschotte, C. and C. Gilbert, *Endogenous viruses: insights into viral evolution and impact on host biology*. Nat Rev Genet, 2012. **13**(4): p. 283-96.
- 16 10. Holmes, E.C., *The evolution of endogenous viral elements*. Cell Host Microbe, 2011. **10**(4): p. 368-77.
- 17 11. Belyi, V.A., A.J. Levine, and A.M. Skalka, *Sequences from ancestral single-stranded DNA viruses in vertebrate genomes: the parvoviridae and circoviridae are more than 40 to 50 million years old*. J Virol, 2010. **84**(23): p. 12458-62.
- 18 12. Kapoor, A., P. Simmonds, and W.I. Lipkin, *Discovery and characterization of mammalian endogenous parvoviruses*. J Virol, 2010. **84**(24): p. 12628-35.
- 19 13. Katzourakis, A. and R.J. Gifford, *Endogenous viral elements in animal genomes*. PLoS Genet, 2010. **6**(11): p. e1001191.
- 20 14. Liu, H., et al., *Widespread endogenization of densovirus and parvovirus in animal and human genomes*. J Virol, 2011. **85**(19): p. 9863-76.
- 21 15. Matthey, R., *La formule chromosomique et le problème de la détermination sexuelle chez Ellobius lutescens.*, Arch Klaus-Stift Vererb-Forsch, 1953. **28**: p. 65-73.
- 22 16. Mulugeta, E., et al., *Genomes of Ellobius species provide insight into the evolutionary dynamics of mammalian sex chromosomes*. Genome Res, 2016. **26**(9): p. 1202-10.
- 23 17. Fabre, P.H., et al., *A glimpse on the pattern of rodent diversification: a phylogenetic approach*. BMC Evol Biol, 2012. **12**: p. 88.
- 24 18. Pisano, J., et al., *Out of Himalaya: the impact of past Asian environmental changes on the evolutionary and biogeographical history of Dipodoidea (Rodentia)*. Journal of Biogeography, 2015. **42**(5): p. 856-870.
- 25 19. Bexfield, N. and P. Kellam, *Metagenomics and the molecular identification of novel viruses*. Vet J, 2011. **190**(2): p. 191-8.
- 26 20. Arriagada, G. and R.J. Gifford, *Parvovirus-derived endogenous viral elements in two South American rodent genomes*. J Virol, 2014. **88**(20): p. 12158-62.



- 1 21. Edgar, R.C., *MUSCLE: a multiple sequence alignment method with reduced time and*  
2 *space complexity*. BMC Bioinformatics, 2004. **5**: p. 113.
- 3 22. Suyama, M., D. Torrents, and P. Bork, *PAL2NAL: robust conversion of protein sequence*  
4 *alignments into the corresponding codon alignments*. Nucleic Acids Res, 2006. **34**(Web  
5 Server issue): p. W609-12.
- 6 23. Stamatakis, A., *RAxML version 8: a tool for phylogenetic analysis and post-analysis of*  
7 *large phylogenies*. Bioinformatics, 2014. **30**(9): p. 1312-3.
- 8 24. Dimmic, M.W., et al., *rtREV: an amino acid substitution matrix for inference of retrovirus*  
9 *and reverse transcriptase phylogeny*. J Mol Evol, 2002. **55**(1): p. 65-73.
- 10 25. Darriba, D., et al., *ProtTest 3: fast selection of best-fit models of protein evolution*.  
11 Bioinformatics, 2011. **27**(8): p. 1164-5.  
12
